# Supplementary material for: Brain Death and Its Prediction in Out-of-Hospital Cardiac Arrest Patients Treated with Targeted Temperature Management
Source: MDPI journal article supplement (doi:10.3390/diagnostics12051190), 2022-05-10
Supplement: s1 [file s1]

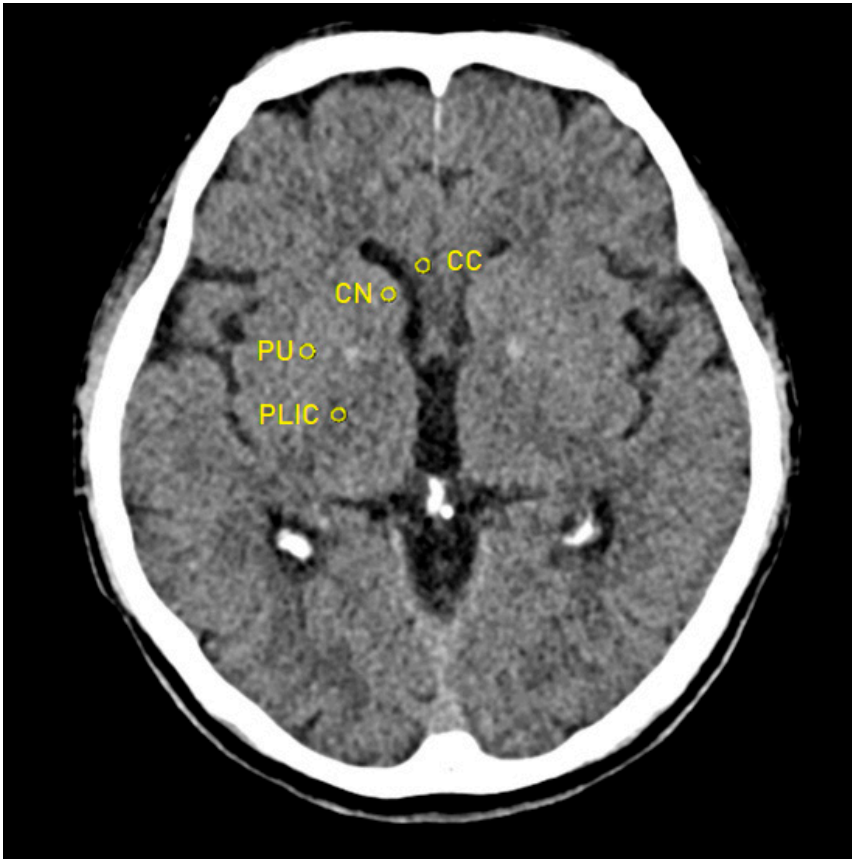

**Figure S1.** Brain computed tomography images showing the measurements in Hounsfield units at the basal ganglia level. The circular regions of interest ( $10 \text{ mm}^2$ ) are positioned in the caudate nucleus (CN), putamen (PU), posterior limb of the internal capsule (PLIC), and genu of the corpus callosum (CC) at the level of the basal ganglia.

The gray-to-white matter ratios (GWRs) were calculated according to the following formulas:

$$\text{GWR} = (\text{CN} + \text{PU}) / (\text{CC} + \text{PLIC})$$

**Table S1.** Baseline characteristics and results of prognostication tests in brain-dead patients.

| Case | Sex/age, years | Witnessed | Bystander CPR | Shockable rhythm | Anoxic time <sup>a</sup> , min | Cause of arrest | GWR  | DWI <sup>b</sup> | SSEP   | Peak NSE, ng/mL (time, h) | Peak S100, ng/mL (time, h) | Hospital days of BD | Donated organ procurement                 |
|------|----------------|-----------|---------------|------------------|--------------------------------|-----------------|------|------------------|--------|---------------------------|----------------------------|---------------------|-------------------------------------------|
| 1    | M/51           | Yes       | Yes           | No               | 24                             | Cardiac         | 1.21 | -                | N20(-) | 98.19 (72)                | 12.18 (72)                 | 5                   | Liver, kidneys (2)                        |
| 2    | F/38           | No        | No            | No               | 41                             | Asphyxia        | 1.17 | -                | N20(-) | 201.32 (24)               | 15.01 (24)                 | 5                   | Liver                                     |
| 3    | F/29           | No        | Yes           | No               | 110                            | Asphyxia        | 1.17 | M                | N20(-) | 72.39 (48)                | 7.25 (24)                  | 5                   | Liver, kidneys (2), heart, lung, pancreas |
| 4    | M/58           | No        | No            | No               | 42                             | Other-medical   | 1.04 | M                | N20(-) | 201.55 (72)               | 31.91 (72)                 | 9                   | Liver                                     |
| 5    | M/70           | Yes       | Yes           | No               | 33                             | Cardiac         | 0.90 | -                | -      | 207.86 (48)               | 23.4 (24)                  | 6                   | Liver, kidneys (2)                        |
| 6    | M/58           | Yes       | Yes           | No               | 20                             | Other-medical   | 1.16 | M                | N20(-) | 209.98 (48)               | 0.91 (48)                  | 11                  | Liver, kidneys (2)                        |
| 7    | F/50           | No        | Yes           | No               | 30                             | Asphyxia        | -    | M                | N20(-) | 91.16 (24)                | 24.65 (24)                 | 6                   | Liver, kidneys (2)                        |
| 8    | M/43           | No        | Yes           | No               | 87                             | Asphyxia        | 1.15 | -                | -      | 210.97 (24)               | 5.68 (0)                   | 4                   | Liver, kidneys (2)                        |
| 9    | M/38           | No        | Yes           | No               | 53                             | Asphyxia        | 1.20 | M                | N20(-) | 136.47(48)                | 3.87 (0)                   | 4                   | Liver, kidneys (2), lung, pancreas        |
| 10   | F/46           | No        | Yes           | No               | 41                             | Asphyxia        | 1.12 | M                | N20(-) | 157.00 (48)               | 5.38 (0)                   | 6                   | Liver, kidneys (2), lung                  |
| 11   | M/24           | Yes       | No            | No               | 52                             | Asphyxia        | 1.16 | M                | -      | 213.66 (72)               | 16.8 (72)                  | 7                   | Liver, kidneys (2), heart, pancreas       |
| 12   | M/47           | No        | Yes           | No               | 77                             | Asphyxia        | 1.13 | M                | N20(-) | 140.11 (48)               | 4.67 (0)                   | 11                  | Liver, kidneys (2), heart, lung           |
| 13   | M/21           | No        | Yes           | Yes              | 41                             | Asphyxia        | 1.04 | M                | -      | 184.13 (24)               | 12.61 (24)                 | 5                   | Liver, kidneys (2), heart, pancreas       |
| 14   | M/45           | No        | Yes           | No               | 36                             | Asphyxia        | 1.18 | M                | N20(-) | 78.56 (24)                | 30.46 (24)                 | 5                   | Liver, kidneys (2), heart, pancreas       |
| 15   | F/33           | No        | No            | Yes              | 46                             | Asphyxia        | 1.18 | M                | N20(-) | 196.67 (48)               | 0.41 (24)                  | 12                  | Liver, kidneys (2), lung, heart, pancreas |
| 16   | F/38           | No        | No            | No               | 32                             | Asphyxia        | 1.22 | M                | N20(-) | 192.28 (24)               | 1.51 (24)                  | 7                   | Liver, kidney, heart, lung, pancreas      |
| 17   | M/32           | No        | Yes           | No               | 56                             | Asphyxia        | 1.15 | M                | N20(-) | 79.83 (72)                | 1.25 (0)                   | 7                   | Liver, kidneys (2), heart                 |
| 18   | M/54           | Yes       | No            | No               | 54                             | Cardiac         | 1.00 | M                | -      | 215.0 (24)                | 15.43 (72)                 | 6                   | Kidneys (2)                               |
| 19   | M/57           | Yes       | No            | No               | 41                             | Other-medical   | 1.06 | M                | -      | 170.58 (24)               | 18.62 (48)                 | 7                   | Liver, kidneys (2)                        |

CPR, cardiopulmonary resuscitation; GWR, gray-to-white matter ratio at basal ganglia; DWI, diffusion-weighted imaging; SSEP, somatosensory evoked potential measurements; NSE, neuron-specific enolase; S100B, S100 calcium-binding protein B; BD, brain death.

<sup>a</sup>Time from arrest to return of spontaneous circulation.

<sup>b</sup>DWI findings were categorized as follows: N, no lesion; I, isolated cortex or deep gray matter lesion; M, multifocal or global lesion.
